# Supplementary material for: Systematic antibody generation and validation via tissue microarray technology leading to identification of a novel protein prognostic panel in breast cancer
Source: PubMed Central journal article supplement (PMC3668187; doi:10.1186/1471-2407-13-175), 2013-04-02
Supplement: 1471-2407-13-175-S1.pdf [file 1471-2407-13-175-S1.pdf]

## **Supplementary Tables**

### **Additional file 1**

**Supplementary Table 1:** List of fifty-six protein targets submitted to the SHPR for target-specific antibody generation. From this submitted list, eighteen antibodies were released for extended analysis.

| Ensembl Gene ID   | Ensembl Transcript ID | External Gene ID | Gene List                                                                                                                                                                               | Antibodies Released |
|-------------------|-----------------------|------------------|-----------------------------------------------------------------------------------------------------------------------------------------------------------------------------------------|---------------------|
| ENSG00000124935.2 | ENST00000244926.2     | SCGB1D2          | <i>BGA re-analysis of top 5000 genes associated with prognosis</i><br><u>Source:</u> Van't Veer et al (Nature 2002)<br><u>Top 15 genes:</u> Upregulation associated with Good Prognosis | Yes                 |
| ENSG00000164128.1 | ENST00000296533.1     | NPY1R            |                                                                                                                                                                                         | Yes                 |
| ENSG00000110484.1 | ENST00000227918.1     | SCGB2A2          |                                                                                                                                                                                         |                     |
| ENSG00000175356.2 | ENST00000309263.2     | SCUBE2           |                                                                                                                                                                                         |                     |
| ENSG00000145824.4 | ENST00000337225.2     | CXCL14           |                                                                                                                                                                                         |                     |
| ENSG00000174827.4 | ENST00000339729.2     | PDZK1            |                                                                                                                                                                                         |                     |
| ENSG00000196136.1 | ENST00000261981.3     | SERPINA3         |                                                                                                                                                                                         |                     |
| ENSG00000144891.7 | ENST00000349243.1     | AGTR1            |                                                                                                                                                                                         |                     |
| ENSG00000160182.1 | ENST00000291527.1     | TFF1             |                                                                                                                                                                                         |                     |
| ENSG00000160180.6 | ENST00000291525.6     | TFF3             |                                                                                                                                                                                         |                     |
| ENSG00000118513.7 | ENST00000341545.2     | MYB              |                                                                                                                                                                                         |                     |
| ENSG00000124479.3 | ENST00000244349.1     | NDP              |                                                                                                                                                                                         |                     |
| ENSG00000178568.4 | ENST00000342788.1     | ERBB4            |                                                                                                                                                                                         | Yes                 |
| ENSG00000120875.1 | ENST00000240100.1     | DUSP4            |                                                                                                                                                                                         |                     |
| ENSG00000116176.4 | ENST00000234798.2     | TPSG1            |                                                                                                                                                                                         |                     |
| ENSG00000185686.5 | ENST00000358617.1     | PRAME            | <i>BGA re-analysis of top 100 genes associated with prognosis</i><br><u>Source:</u> Van't Veer et al (Nature 2002)<br><u>Top 16 genes:</u> Upregulation associated with Poor Prognosis  | Yes                 |
| ENSG00000167614.3 | ENST00000301194.2     | TTYH1            |                                                                                                                                                                                         |                     |
| ENSG00000143546.1 | ENST00000271846.1     | S100A8           |                                                                                                                                                                                         |                     |
| ENSG00000163220.3 | ENST00000295382.2     | S100A9           |                                                                                                                                                                                         |                     |
| ENSG00000007062.2 | ENST00000265014.2     | PROM1            |                                                                                                                                                                                         |                     |
| ENSG00000127324.2 | ENST00000247829.2     | TM4SF3           |                                                                                                                                                                                         |                     |
| ENSG00000109255.1 | ENST00000264218.1     | NMU              |                                                                                                                                                                                         |                     |
| ENSG00000136943.2 | ENST00000259470.2     | CTSL2            |                                                                                                                                                                                         |                     |
| ENSG00000183036.2 | ENST00000328619.2     | PCP4             |                                                                                                                                                                                         | Yes                 |
| ENSG00000134760.2 | ENST00000257192.2     | DSG1             |                                                                                                                                                                                         |                     |
| ENSG00000169679.2 | ENST00000302759.2     | BUB1             |                                                                                                                                                                                         |                     |
| ENSG00000107159.2 | ENST00000291153.2     | CA9              |                                                                                                                                                                                         |                     |
| ENSG00000130829.7 | ENST00000361486.1     | DUSP9            |                                                                                                                                                                                         |                     |

|                   |                   |          |                                                                                                                                                                 |     |
|-------------------|-------------------|----------|-----------------------------------------------------------------------------------------------------------------------------------------------------------------|-----|
| ENSG00000117650.2 | ENST00000261456.2 | NEK2     |                                                                                                                                                                 |     |
| ENSG00000164109.3 | ENST00000296509.2 | MAD2L1   |                                                                                                                                                                 |     |
| ENSG00000126977.1 | ENST00000247413.1 | MAGEA1   |                                                                                                                                                                 |     |
| ENSG00000011426.2 | ENST00000265748.1 | ANLN     | <i>Genes associated with DCIS to invasive ductal carcinoma transition</i><br><u>Source:</u> Ma et al (PNAS 2003)<br><u>25 Genes:</u> upregulated in IDC Vs DCIS | Yes |
| ENSG00000013810.6 | ENST00000313288.2 | TACC3    |                                                                                                                                                                 | Yes |
| ENSG00000076003.1 | ENST00000264156.1 | MCM6     |                                                                                                                                                                 |     |
| ENSG00000096238.2 | ENST00000211475.2 | CLIC1    |                                                                                                                                                                 | Yes |
| ENSG00000100526.6 | ENST00000335183.3 | CDKN3    |                                                                                                                                                                 |     |
| ENSG00000103187.2 | ENST00000262428.2 | COTL1    |                                                                                                                                                                 | Yes |
| ENSG00000111665.2 | ENST00000229265.1 | CDCA3    |                                                                                                                                                                 | Yes |
| ENSG00000115310.7 | ENST00000357376.1 | RTN4     |                                                                                                                                                                 |     |
| ENSG00000123975.1 | ENST00000243756.1 | CKS2     |                                                                                                                                                                 |     |
| ENSG00000131747.5 | ENST00000357601.1 | TOP2A    |                                                                                                                                                                 | Yes |
| ENSG00000135476.2 | ENST00000257934.2 | ESPL1    |                                                                                                                                                                 |     |
| ENSG00000143416.7 | ENST00000290533.6 | SELENBP1 |                                                                                                                                                                 | Yes |
| ENSG00000145020.3 | ENST00000273588.2 | AMT      |                                                                                                                                                                 | Yes |
| ENSG00000158402.7 | ENST00000337493.1 | CDC25C   |                                                                                                                                                                 |     |
| ENSG00000162896.2 | ENST00000356495.1 | PIGR     |                                                                                                                                                                 | Yes |
| ENSG00000168078.1 | ENST00000301905.1 | PBK      |                                                                                                                                                                 | Yes |
| ENSG00000168393.5 | ENST00000305784.1 | DTYMK    |                                                                                                                                                                 |     |
| ENSG00000171848.2 | ENST00000304567.2 | RRM2     |                                                                                                                                                                 |     |
| ENSG00000173540.3 | ENST00000308388.2 | GMPPB    |                                                                                                                                                                 | Yes |
| ENSG00000175063.7 | ENST00000343198.1 | UBE2C    |                                                                                                                                                                 | Yes |
| ENSG00000176619.2 | ENST00000325327.2 | LMNB2    |                                                                                                                                                                 |     |
| ENSG00000182054.1 | ENST00000330062.1 | IDH2     |                                                                                                                                                                 | Yes |
| ENSG00000188042.2 | ENST00000339728.2 | ARL7     |                                                                                                                                                                 |     |
| ENSG00000188547.2 | ENST00000341784.1 | DTYMK    |                                                                                                                                                                 |     |
| ENSG00000143320.1 | ENST00000271558.1 | CRABP2   |                                                                                                                                                                 |     |

**Supplementary Table 2:** List of ten publicly available transcriptomic datasets included in a meta-analysis to evaluate the individual prognostic significance of candidate proteins (ANLN, PBK, PDZK1) at the transcriptomic level.

| <b>Reference</b>           | <b>GEO Accession Number</b> | <b>Availability</b> | <b>Sample Number</b> | <b>Platform Type</b>                                                        |
|----------------------------|-----------------------------|---------------------|----------------------|-----------------------------------------------------------------------------|
| Calabro et al., 2009 [4]   | GSE10510                    | Raw data available  | 152                  | DKFZ Division of Molecular Genome Analysis Human Operon 4.0 oligo Array 35k |
| Chang et al., 2005 [5]     | NA                          | Processed only      | 295                  | Agilent                                                                     |
| Desmedt et al., 2009 [6]   | GSE16391                    | Raw CEL files       | 48                   | Affymetrix U133 Plus 2.0                                                    |
| Hu et al., 2006 [7]        | GSE1992                     | Processed only      | 99                   | Agilent                                                                     |
| Kok et al., 2009 [8]       | NA                          | Processed only      | 109                  | Agilent 44K oligo array                                                     |
| Loi et al., 2008 [9]       | GSE9195                     | Raw CEL files       | 77                   | Affymetrix U133 Plus 2.0                                                    |
| Loi et al., 2008 [9]       | GSE6532                     | Raw CEL files       | 87                   | Affymetrix U133A/B and plus2                                                |
| Sabatier et al., 2010 [10] | GSE21653                    | Raw CEL files       | 266                  | Affymetrix U133 Plus 2.0                                                    |
| Sabatier et al., 2010 [10] | GSE17907                    | Raw CEL files       | 51                   | Affymetrix U133 Plus 2.0                                                    |
| Chanrion et al., 2008 [11] | GSE9893                     | Raw data available  | 155                  | MLRG Human 21K V12.0                                                        |

**Supplementary Table S3:** Association of PDZK1, PBK and ANLN expression with clinicopathological parameters in the consecutive cohort

| Variable                    | PDZK1 Expression       |                        | <i>p</i> -value | PBK Expression     |                     | <i>p</i> -value   | ANLN Expression       |                        | <i>p</i> -value   |
|-----------------------------|------------------------|------------------------|-----------------|--------------------|---------------------|-------------------|-----------------------|------------------------|-------------------|
|                             | Low PDZK1<br>(n = 237) | High PDZK1<br>(n = 43) |                 | Low PBK<br>(n=187) | High PBK<br>(n=105) |                   | Low ANLN<br>(n = 170) | High ANLN<br>(n = 309) |                   |
| <b>Mean Age</b>             |                        |                        | 1.000           |                    |                     | 0.308             |                       |                        | <b>0.019</b>      |
| <50 years#                  | 37 (15.6)              | 7 (16.3)               |                 | 25 (13.4)          | 19 (18.1)           |                   | 18 (10.6)             | 58 (18.8)              |                   |
| >50 years#                  | 200 (84.4)             | 36 (83.7)              |                 | 162 (86.6)         | 86 (81.9)           |                   | 152 (89.4)            | 251 (81.2)             |                   |
| <b>Tumour Size</b>          |                        |                        | 0.866           |                    |                     | 0.523             |                       |                        | <b>0.006</b>      |
| 1 - 19mm                    | 152 (64.1)             | 27 (62.8)              |                 | 121 (64.7)         | 64 (61.0)           |                   | 119 (70.0)            | 177 (57.3)             |                   |
| > 20mm                      | 85 (35.9)              | 16 (37.2)              |                 | 66 (35.3)          | 41 (39.0)           |                   | 51 (30.0)             | 132 (42.7)             |                   |
| <b>Histological subtype</b> |                        |                        | 0.562*          |                    |                     | 0.124*            |                       |                        | <b>&lt;0.001*</b> |
| Indeterminate               | 17 (7.2)               | 4 (9.3)                |                 | 12 (6.4)           | 11 (10.5)           |                   | 11 (6.5)              | 22 (7.1)               |                   |
| IDC                         | 158 (66.7)             | 33 (76.7)              |                 | 122 (65.2)         | 78 (74.3)           |                   | 95 (55.9)             | 224 (72.5)             |                   |
| ILC                         | 35 (14.8)              | 4 (9.3)                |                 | 27 (14.4)          | 10 (9.5)            |                   | 40 (23.5)             | 29 (9.4)               |                   |
| Tubular                     | 13 (5.5)               | 1 (2.3)                |                 | 16 (8.6)           | 2 (1.9)             |                   | 15 (8.8)              | 14 (4.5)               |                   |
| Medullary                   | 9 (3.8)                | 0 (0.0)                |                 | 5 (2.7)            | 2 (1.9)             |                   | 0 (0.0)               | 13 (4.2)               |                   |
| Mucinous                    | 5 (2.1)                | 1 (2.3)                |                 | 5 (2.7)            | 2 (1.9)             |                   | 9 (5.3)               | 7 (2.3)                |                   |
| <b>Tumour Grade</b>         |                        |                        | <b>0.01*</b>    |                    |                     | <b>&lt;0.001*</b> |                       |                        | <b>&lt;0.001*</b> |
| I                           | 49 (20.7)              | 11 (26.2)              |                 | 56 (30.1)          | 14 (13.3)           |                   | 66 (38.8)             | 52 (16.9)              |                   |
| II                          | 97 (40.9)              | 25 (59.5)              |                 | 80 (43.0)          | 40 (38.1)           |                   | 84 (49.4)             | 117 (38.0)             |                   |
| III                         | 91 (38.4)              | 6 (14.3)               |                 | 50 (26.9)          | 51 (48.6)           |                   | 20 (11.8)             | 139 (45.1)             |                   |
| Unknown                     | 0                      | 1                      |                 | 1                  | 0                   |                   | 0                     | 1                      |                   |
| <b>Nodal status</b>         |                        |                        | 0.261           |                    |                     | 0.283             |                       |                        | 0.058             |
| N0                          | 131 (61.5)             | 27 (71.1)              |                 | 99 (60.0)          | 64 (66.7)           |                   | 102 (68.5)            | 165 (59.1)             |                   |
| N1+                         | 82 (38.5)              | 11 (28.9)              |                 | 66 (40.0)          | 32 (33.3)           |                   | 47 (31.5)             | 114 (40.9)             |                   |
| Unknown                     | 24                     | 5                      |                 | 22                 | 9                   |                   | 21                    | 30                     |                   |
| <b>ER status</b>            |                        |                        | <b>0.041</b>    |                    |                     | 0.251             |                       |                        | <b>&lt;0.001</b>  |
| ER Negative                 | 41 (17.8)              | 2 (5.0)                |                 | 26 (14.4)          | 20 (19.6)           |                   | 6 (3.8)               | 60 (20.4)              |                   |

|                  |            |           |       |            |           |                  |            |            |                  |
|------------------|------------|-----------|-------|------------|-----------|------------------|------------|------------|------------------|
| ER Positive      | 189 (82.2) | 38 (95.0) |       | 155 (85.6) | 82 (80.4) |                  | 154 (96.2) | 234 (79.6) |                  |
| Unknown          | 7          | 3         |       | 6          | 3         |                  | 10         | 15         |                  |
| <b>PR status</b> |            |           | 0.074 |            |           | 0.078            |            |            | <b>0.044</b>     |
| PR Negative      | 75 (39.3)  | 7 (22.6)  |       | 51 (34.2)  | 39 (45.9) |                  | 36 (30.5)  | 98 (41.5)  |                  |
| PR Positive      | 116 (60.7) | 24 (77.4) |       | 98 (65.8)  | 46 (54.1) |                  | 82 (69.5)  | 138 (58.5) |                  |
| Unknown          | 46         | 12        |       | 38         | 20        |                  | 52         | 73         |                  |
| <b>HER2</b>      |            |           | 0.273 |            |           | 0.189            |            |            | <b>&lt;0.001</b> |
| 0 - 2 +          | 193 (87.3) | 36 (94.7) |       | 156 (91.2) | 87 (86.1) |                  | 152 (97.4) | 259 (86.3) |                  |
| 3+               | 28 (12.7)  | 2 (5.3)   |       | 15 (8.8)   | 14 (13.9) |                  | 4 (2.6)    | 41 (13.7)  |                  |
| Unknown          | 16         | 5         |       | 16         | 4         |                  | 14         | 9          |                  |
| <b>Ki67</b>      |            |           | 0.462 |            |           | <b>&lt;0.001</b> |            |            | <b>&lt;0.001</b> |
| 0 – 10%          | 87 (37.8)  | 18 (43.9) |       | 84 (46.9)  | 26 (25.0) |                  | 110 (67.9) | 61 (21.0)  |                  |
| 11 - 100%        | 143 (62.2) | 23 (56.1) |       | 95 (53.1)  | 78 (75.0) |                  | 52 (32.1)  | 229 (79.0) |                  |
| Unknown          | 7          | 2         |       | 8          | 1         |                  | 8          | 19         |                  |

\*Linear-by-linear  $\chi^2$  analysis; Others by Fisher's Exact test; #years at diagnosis

**Supplementary Table S4:** Cox regression analysis of individual marker expression in relation to BCSS in the consecutive cohort.

| Prognostic Factor                   | Univariate |               |         | Multivariate* |                |         |
|-------------------------------------|------------|---------------|---------|---------------|----------------|---------|
|                                     | HR         | 95% CI        | p-value | HR            | 95% CI         | p-value |
| PDZK1<br>(high vs. low, ref)        | 0.169      | 0.023 – 1.239 | 0.080   | -             | -              | 0.969   |
| PBK<br>(high vs. low, ref)          | 2.329      | 1.191 – 4.554 | 0.013   | 3.847         | 1.461 – 10.131 | 0.006   |
| ANLN<br>(high vs. low, ref)         | 3.914      | 1.849 – 8.287 | <0.001  | 4.596         | 1.147 – 18.424 | 0.031   |
| Tumour Size<br>(continuous)         | 1.016      | 1.008 – 1.024 | <0.001  | 1.021         | 1.003 - 1.040  | 0.022   |
| Nodal status<br>(pos vs. neg, ref)  | 5.142      | 2.910 – 9.088 | <0.001  | 5.671         | 1.823 – 17.645 | 0.003   |
| Tumour Grade<br>(3 vs. 1-2, ref)    | 4.990      | 2.892 – 8.610 | <0.001  | 2.788         | 0.907 – 8.569  | 0.073   |
| ER status<br>(pos vs. neg, ref)     | 0.516      | 0.272 – 0.981 | 0.043   | 2.422         | 0.571 – 10.271 | 0.230   |
| PR status<br>(pos vs. neg, ref)     | 0.274      | 0.146 - 0.513 | <0.001  | 0.333         | 0.111 – 1.000  | 0.050   |
| Ki67 status<br>(>10% vs. ≤10%, ref) | 2.977      | 1.498 – 5.917 | 0.002   | 4.747         | 0.186 – 3.119  | 0.704   |
| Her2 status<br>(2-3 vs. 0-1, ref)   | 1.090      | 0.467 - 2.543 | 0.842   | 0.761         | 0.186 – 3.119  | 0.704   |
| Tumour type<br>(categorical)        | 0.700      | 0.496 – 0.989 | 0.043   | -             | -              | -       |
| Age<br>(continuous)                 | 0.986      | 0.965 – 1.007 | 0.184   | 0.570         | 0.212 – 1.529  | 0.264   |

\*Adjusted for all other variables in the table; ref, referent group.

**Supplementary Table S5:** Cox regression analysis of individual marker expression in relation to RFS in the consecutive cohort.

| Prognostic Factor                   | Univariate |               |         | Multivariate* |               |         |
|-------------------------------------|------------|---------------|---------|---------------|---------------|---------|
|                                     | HR         | 95% CI        | p-value | HR            | 95% CI        | p-value |
| PDZK1<br>(high vs. low, ref)        | 0.647      | 0.311 – 1.345 | 0.243   | 0.713         | 0.257 – 1.979 | 0.516   |
| PBK<br>(high vs. low, ref)          | 1.636      | 1.071 – 3.614 | 0.023   | 1.393         | 0.785 – 2.472 | 0.257   |
| ANLN<br>(high vs. low, ref)         | 2.409      | 1.606 – 3.614 | <0.001  | 2.122         | 0.995 – 4.523 | 0.051   |
| Tumour Size<br>(continuous)         | 1.009      | 1.003 – 1.015 | 0.003   | 1.005         | 0.991 - 1.019 | 0.505   |
| Nodal status<br>(pos vs. neg, ref)  | 3.368      | 2.382 – 4.763 | <0.001  | 2.867         | 1.493 – 5.507 | 0.002   |
| Tumour Grade<br>(3 vs. 1-2, ref)    | 3.156      | 2.274 – 4.381 | <0.001  | 2.302         | 1.176 - 4.505 | 0.015   |
| ER status<br>(pos vs. neg, ref)     | 0.706      | 0.460 – 1.082 | 0.110   | 1.957         | 0.765 – 5.005 | 0.161   |
| PR status<br>(pos vs. neg, ref)     | 0.513      | 0.351 - 0.749 | 0.001   | 0.483         | 0.246 - 0.949 | 0.035   |
| Ki67 status<br>(>10% vs. ≤10%, ref) | 1.911      | 1.310 – 2.788 | 0.001   | 1.103         | 0.516 – 2.359 | 0.801   |
| Her2 status<br>(2-3 vs. 0-1, ref)   | 0.792      | 0.437 -1.433  | 0.441   | 0.542         | 0.191 – 1.542 | 0.251   |
| Tumour type<br>(categorical)        | 0.774      | 0.639 – 0.938 | 0.009   | -             | -             | -       |
| Age<br>(continuous)                 | 1.003      | 0.989 – 1.016 | 0.700   | 0.706         | 0.363 – 1.375 | 0.307   |

\*Adjusted for all other variables in the table; ref, referent group.



**Supplementary Table S6:** Cox regression analysis of clinicopathological parameters and panel score in relation to BCSS in the consecutive cohort

| Prognostic Factor                   | Univariate |                 |                 | Multivariate* |                |                 |
|-------------------------------------|------------|-----------------|-----------------|---------------|----------------|-----------------|
|                                     | HR         | 95% CI          | <i>p</i> -value | HR            | 95% CI         | <i>p</i> -value |
| 3 Panel Score<br>(2-3 vs. 0-1, ref) | 16.363     | 2.226 – 120.295 | 0.006           | 6.375         | 0.793 – 51.528 | 0.082           |
| Tumour Size<br>(continuous)         | 1.016      | 1.008 – 1.024   | <0.001          | 0.982         | 0.948 – 1.017  | 0.035           |
| Nodal status<br>(pos vs. neg, ref)  | 5.142      | 2.910 – 9.088   | <0.001          | 2.744         | 0.987 – 7.624  | 0.053           |
| Tumour Grade<br>(3 vs. 1-2, ref)    | 4.990      | 2.892 – 8.610   | <0.001          | 3.061         | 1.023 – 9.159  | 0.045           |
| ER status<br>(pos vs. neg, ref)     | 0.516      | 0.272 – 0.981   | 0.043           | 3.635         | 0.848 – 15.583 | 0.082           |
| PR status<br>(pos vs. neg, ref)     | 0.274      | 0.146 - 0.513   | <0.001          | 0.256         | 0.084 – 0.775  | 0.016           |
| Ki67 status<br>(>10% vs. ≤10%, ref) | 2.977      | 1.498 – 5.917   | 0.002           | 1.603         | 0.433 – 5.933  | 0.480           |
| Her2 status<br>(2-3 vs. 0-1, ref)   | 1.090      | 0.467 - 2.543   | 0.842           | 0.799         | 0.195 – 3.279  | 0.756           |
| Tumour type<br>(categorical)        | 0.700      | 0.496 – 0.989   | 0.043           | -             | -              | -               |
| Age<br>(continuous)                 | 0.986      | 0.965 – 1.007   | 0.184           | 0.982         | 0.982 – 1.017  | 0.308           |

\*Adjusted for all other variables in the table; ref, referent group.

**Supplementary Table S7:** Cox regression analysis of clinicopathological parameters and panel score in relation to RFS in the consecutive cohort

| Prognostic Factor                   | Univariate |               |                 | Multivariate* |               |                 |
|-------------------------------------|------------|---------------|-----------------|---------------|---------------|-----------------|
|                                     | HR         | 95% CI        | <i>p</i> -value | HR            | 95% CI        | <i>p</i> -value |
| 3 Panel Score<br>(2-3 vs. 0-1, ref) | 3.325      | 1.752 – 6.310 | <0.001          | 1.456         | 0.665 – 3.190 | 0.348           |
| Tumour Size<br>(continuous)         | 1.009      | 1.003 – 1.015 | 0.003           | 1.000         | 0.978 - 1.023 | 0.994           |
| Nodal status<br>(pos vs. neg, ref)  | 3.368      | 2.382 – 4.763 | <0.001          | 2.521         | 1,346 – 4.722 | 0.004           |
| Tumour Grade<br>(3 vs. 1-2, ref)    | 3.156      | 2.274 – 4.381 | <0.001          | 2.326         | 1.184 - 4.567 | 0.014           |
| ER status<br>(pos vs. neg, ref)     | 0.706      | 0.460 – 1.082 | 0.110           | 1.849         | 0.714 – 4.789 | 0.206           |
| PR status<br>(pos vs. neg, ref)     | 0.513      | 0.351 - 0.749 | 0.001           | 0.487         | 0.252 - 0.940 | 0.032           |
| Ki67 status<br>(>10% vs. ≤10%, ref) | 1.911      | 1.310 – 2.788 | 0.001           | 1.322         | 0.648 – 2.697 | 0.443           |
| Her2 status<br>(2-3 vs. 0-1, ref)   | 0.792      | 0.437 -1.433  | 0.441           | 0.534         | 0.187 – 1.525 | 0.242           |
| Tumour type<br>(categorical)        | 0.774      | 0.639 – 0.938 | 0.009           | -             | -             | -               |
| Age<br>(continuous)                 | 1.003      | 0.989 – 1.016 | 0.700           | 1.000         | 0.978 – 1.023 | 0.994           |

\*Adjusted for all other variables in the table; ref, referent group.
